# Supplementary material for: Assessing exposure to Kilkari: a big data analysis of a large maternal mobile messaging service across 13 states in India
Source: PubMed Central journal article supplement (PMC8327807; doi:10.1136/bmjgh-2021-005213), 2021-07-26

## Supplementary tables and figures

Supplementary Table 1. Terminology

| <b>Term</b>                 | <b>Description</b>                                                                                                                                                                                                           |
|-----------------------------|------------------------------------------------------------------------------------------------------------------------------------------------------------------------------------------------------------------------------|
| Successful call             | Call was answered                                                                                                                                                                                                            |
| Switched off                | Call reached mobile device but mobile device was switched off                                                                                                                                                                |
| Not answered                | Call reached mobile device but was not answered                                                                                                                                                                              |
| Not delivered               | Call did not reach mobile. Reasons may include mobile was out of network range; network signal was down in that area; or network congestion prevented call from getting through.                                             |
| Duration of message played  | Duration of that an audio file was played to a subscriber during a Kilhari call                                                                                                                                              |
| Subscriber or beneficiary   | Unique MCTS / RCH ID number linked to a phone number subscribed to Kilhari in MOTECH                                                                                                                                         |
| Subscriber reached          | Subscribers who answer at least one of the first six weekly calls made by the program                                                                                                                                        |
| Creation date               | Date where a new subscription is created into Motech (for women with first pregnancy/ first birth). It is also the date where Motech get an update for new pregnancy or childbirth for women already subscribed into Motech. |
| Expected calls              | Total number of calls subscribers are supposed to receive on their registration to Kilhari based on last menstrual period or child date of birth.                                                                            |
| Calls sent out (pushed out) | Total number of calls in CDR per subscriber, considering one record per weekly message.                                                                                                                                      |
| Duration of content         | Percentage of the total duration of a message that was listened to by a subscriber answering the call                                                                                                                        |
| High listenership (>50%)    | Listening to at least 50% of the duration of content of one call                                                                                                                                                             |
| Calls delivered             | Calls successfully pushed out i.e. calls recorded as successful, not answered or phone switched off                                                                                                                          |

Supplementary Table 2: High listenership amongst successful calls over stage of pregnancy/ postpartum

| State            | 0-12 weeks    | 12-28 weeks     | 28-42 weeks     | >42 weeks       |
|------------------|---------------|-----------------|-----------------|-----------------|
|                  | n (%)         | n (%)           | n (%)           | n (%)           |
| Assam            | 27,104 (50%)  | 1,185,679 (50%) | 849,687 (50%)   | 637,803 (50%)   |
| Bihar            | 54,652 (40%)  | 211,502 (50%)   | 181,548 (50%)   | 156,306 (50%)   |
| Chhattisgarh     | 18,192 (50%)  | 193,400 (50%)   | 180,381 (50%)   | 213,885 (50%)   |
| Delhi            | 13,782 (40%)  | 399,565 (40%)   | 368,981 (40%)   | 534,121 (40%)   |
| Haryana          | 24,671 (40%)  | 223,675 (40%)   | 192,959 (40%)   | 257,288 (40%)   |
| Himachal Pradesh | 3,465 (50%)   | 150,794 (50%)   | 134,026 (50%)   | 219,015 (60%)   |
| Jharkhand        | 395 (60%)     | 9,933 (60%)     | 19,967 (50%)    | 35,595 (50%)    |
| Madhya Pradesh   | 54,124 (50%)  | 393,102 (50%)   | 491,155 (50%)   | 819,944 (50%)   |
| Odisha           | 9,103 (60%)   | 514,574 (60%)   | 558,374 (60%)   | 877,134 (60%)   |
| Rajasthan        | 378,965 (50%) | 432,911 (50%)   | 483,352 (50%)   | 2,089,897 (40%) |
| Uttar Pradesh    | 184,957 (50%) | 1,032,309 (50%) | 1,124,243 (50%) | 1,485,631 (50%) |
| Uttarakhand      | 2,603 (50%)   | 78,748 (40%)    | 104,757 (40%)   | 166,990 (40%)   |
| West Bengal      | 77,322 (50%)  | 1,283,106 (50%) | 1,484,957 (50%) | 5,493,896 (50%) |

Supplementary Table 3: Delivery rates (percentages)

| State            | Delivery rates |
|------------------|----------------|
| Assam            | 26.8%          |
| Bihar            | 35.0%          |
| Chhattisgarh     | 26.3%          |
| Delhi            | 40.5%          |
| Haryana          | 27.9%          |
| Himachal Pradesh | 31.8%          |
| Jharkhand        | 36.7%          |
| Madhya Pradesh   | 27.3%          |
| Odisha           | 27.4%          |
| Rajasthan        | 38.0%          |
| Uttar Pradesh    | 38.2%          |
| Uttarakhand      | 30.4%          |
| West Bengal      | 41.6%          |

Supplementary Figure 1. The distribution of the first message received by subscribers to Kilkari across states

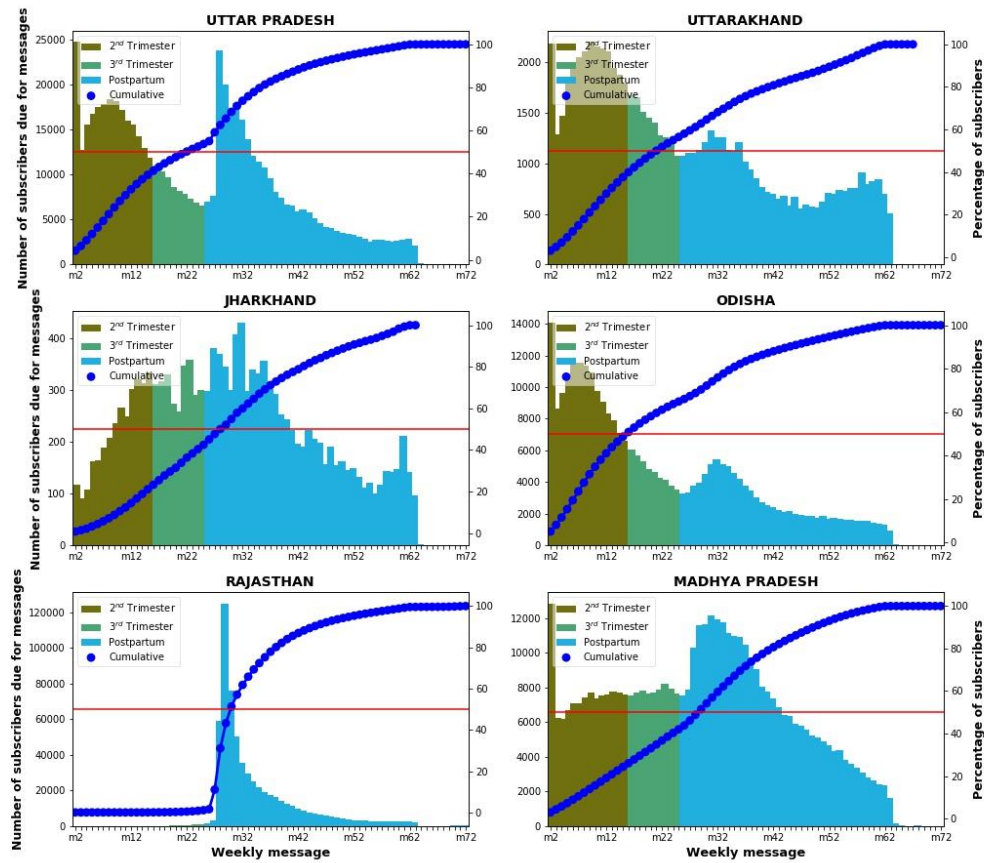

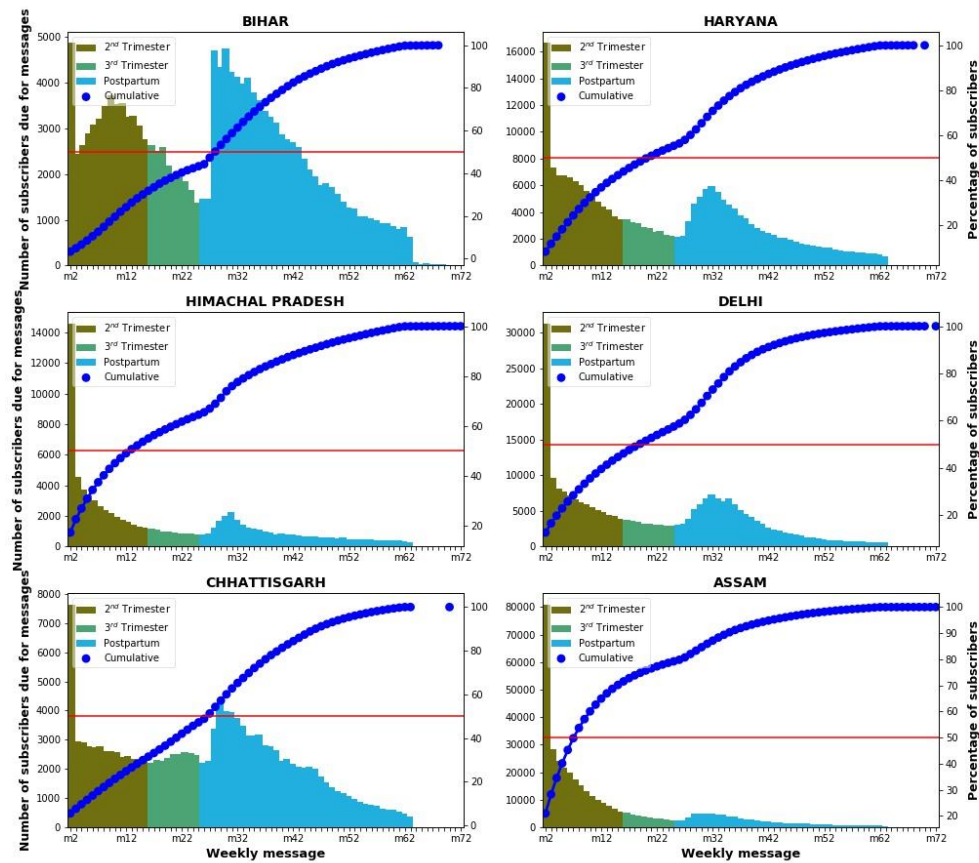

**Supplementary Figure 2. Distribution of call volume by time of day**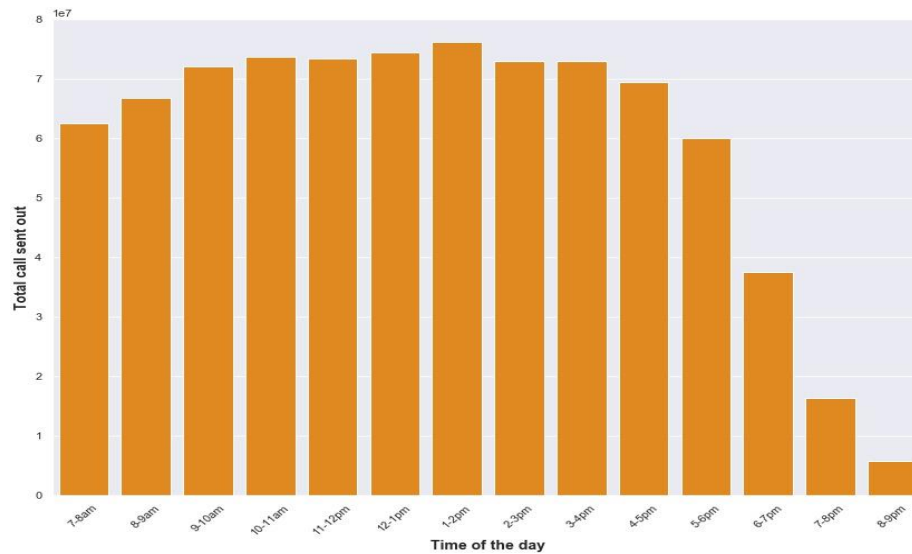**Supplementary Figure 3. Proportion of messages sent out by Motech out of those expected in 2018 across 13 states**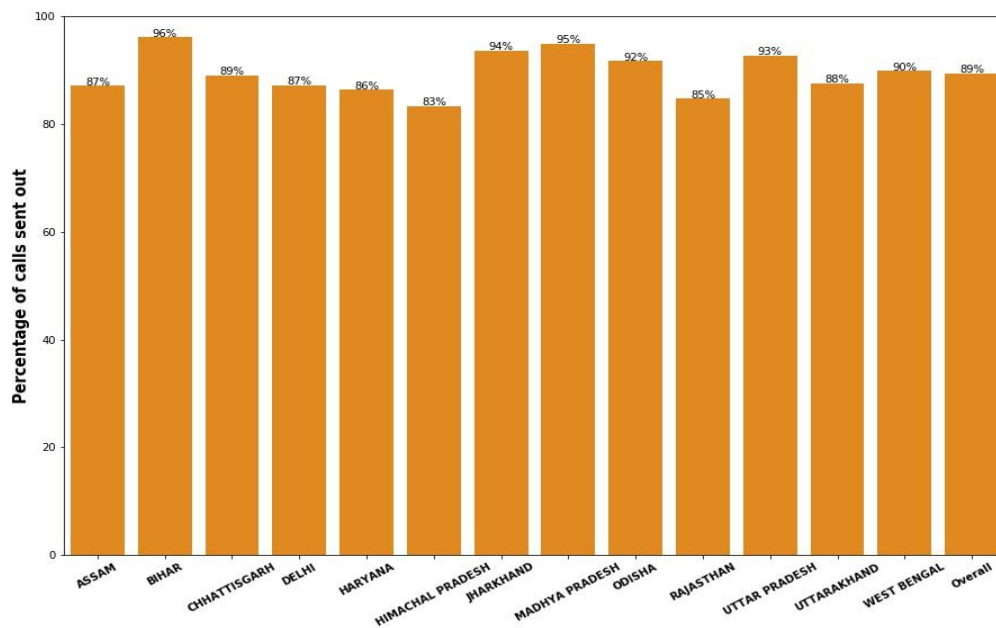

**Supplementary Figure 4. Message delivery rates over pregnancy/ postpartum period across states for 2018**

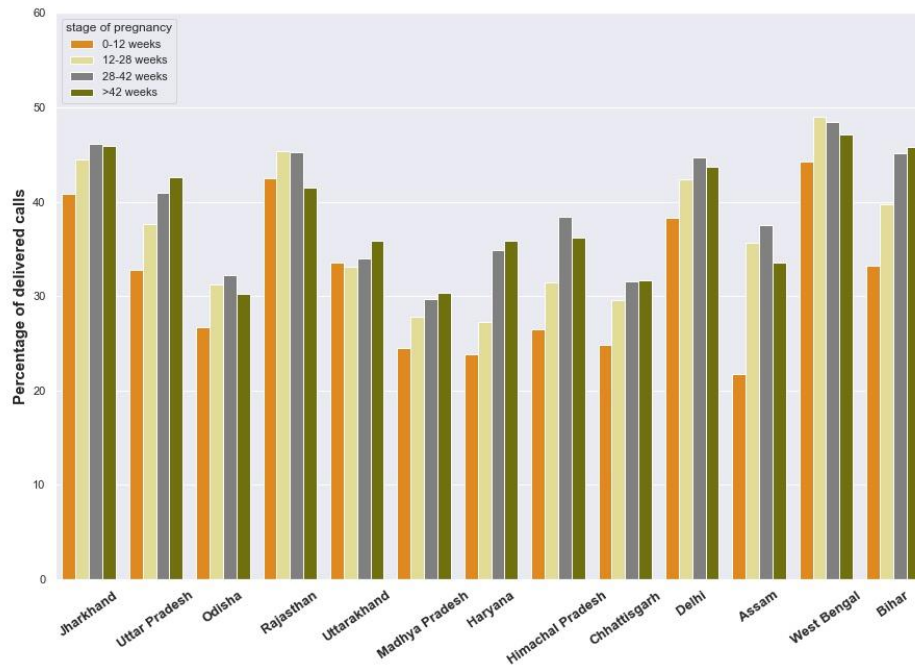

**Supplementary Figure 5. The average call attempts (retries) to successfully reach an end-user's device and have a subscriber pick up the call\***

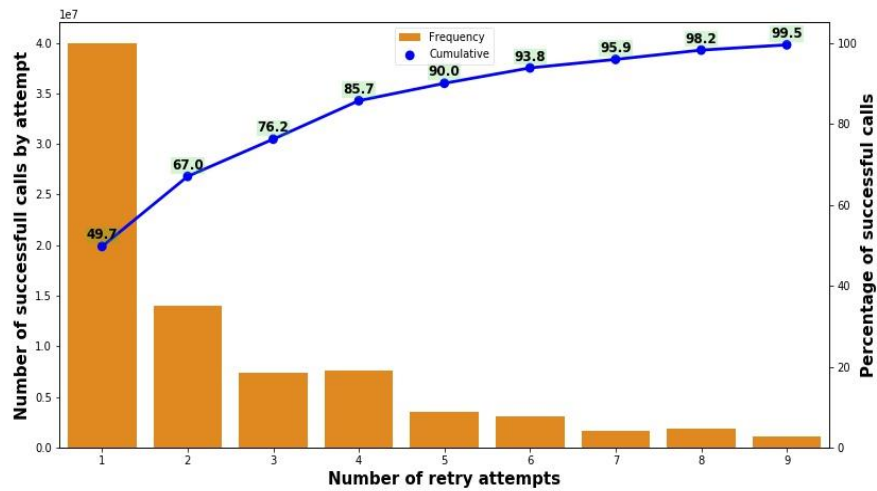

\*The call is classified as 'successful' delivery and thus even if it's picked up and immediately hangs up, it's considered a successful call delivery.

**Supplementary Figure 6: Survival curves for women enrolled during pregnancy or postpartum period.**

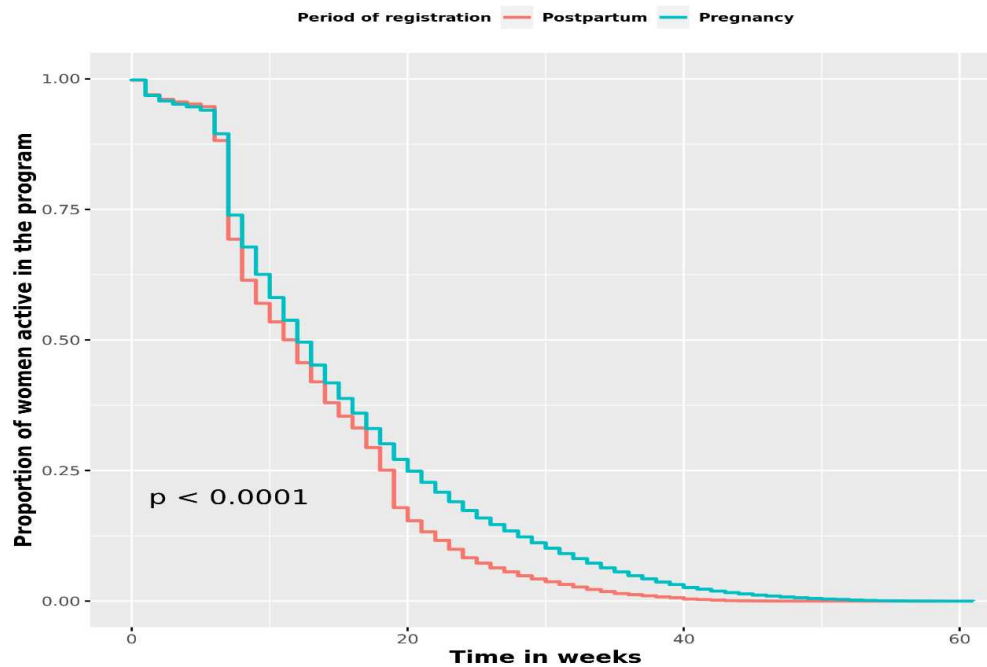

Supplement: bmjgh-2021-005213supp001.pdf [file bmjgh-2021-005213supp001.pdf]
